# Supplementary material for: Importance of the number emission factor of combustion-generated aerosols from nano-enabled products
Source: Research Square preprint supplement (doi:10.21203/rs.3.rs-128400/v1), 2020-12-17
Supplement: Supplementary file 1 [file e8eb2a4ab4f10b3b01147efc.docx]

**Highlights**

- Combustion of nano-enabled products (NEPs) generates fly ash and residual ash.
- The aerosol number emission factor depends strongly on the type of NEP combusted.
- The embedded nanomaterial does not affect the potential release aerosols.
- NEPs can be categorized based on the aerosol release potential during combustion.
